# Supplementary material for: Irreversible fate commitment in the Arabidopsis stomatal lineage requires a FAMA and RETINOBLASTOMA-RELATED module
Source: eLife. 2014 Oct 10;3:e03271. doi: 10.7554/eLife.03271 (PMC4225492; doi:10.7554/eLife.03271)
Supplement: Supplementary file 1. — Primers used in FAMA-RBR study. DOI: http://dx.doi.org/10.7554/eLife.03271.017 [file elife03271s001.xlsx]

## Sheet: Sheet2
Primers used in the FAMA-RBR study
Purpose	Gene name	AGI code or genome location	Primer name	Sequence (5' to 3')	Amplicon size (bp)	From study (if applicable)
Genotyping	fama-1 T-DNA	SALK_100073	fama-1 LP	TCATTCATTTGCTTCCTACGG		Ohashi-Ito & Bergmann, Development, 2006
			fama-1 RP	CAATACAAAAAGCTCCCCTCAC
Constructs	LGK mutation in FAMA	AT3G24140	FAMA-LGKmod-F	CGAGCAACTCGCACAAGCACTTGAATCACAGAAGCG
			FAMA-LGKmod-R	GTGATTCAAGTGCTTGTGCGAGTTGCTCGAGCTCTC
	amiRBR#2		RBR#2-I	GATTTAACGTTGCCTAAGGGCAATCTCTCTTTTGTATTCC
			RBR#2-II	GATTGCCCTTAGGCAACGTTAAATCAAAGAGAATCAATGA
			RBR#2-III	GATTACCCTTAGGCATCGTTAATTCACAGGTCGTGATATG
			RBR#2-IV	GAATTAACGATGCCTAAGGGTAATCTACATATATATTCCT
	LGK mutation in CYCD	AT5G02110	CYCD-LGKmod-F	TAATCTACTCGGAGAAAAATCTTGGCCCGCGAGTCC
			CYCD-LGKmod-R	CTCGCGGGCCAAGATTTTTCTCCGAGTAGATTATCC
qPCR	ACTIN2	AT3G18780	ACTIN2-qPCR-F	CAAGGCCGAGTATGATGAGG	77	Lee et al., Plant Cell, 2010
			ACTIN2-qPCR-R	GAAACGCAGACGTAAGTAAAAAC
	SPCH	AT5G53210	SPCH-qPCR-F	GCTGCTCTTGAAGATTTGGCTC	102
			SPCH-qPCR-R	GCACTCAATTCCAATCTTGATGGTG
	MUTE	AT3G06120	MUTE-qPCR-F	CAAAAGGGGAGATCAAGCTTCG	103
			MUTE-qPCR-R	GGTCTTTCGACGTTTCTTGGAC
	EPF2	AT1G34245	EPF2-qPCR-F	CGCGTGTTCTTTGGTCGTTAAC	113
			EPF2-qPCR-R	CCTTCTTGTGGTGCGTTTGAG
	BASL	AT5G60880	BASL-qPCR-F	CCTCTAGACGGAGATGAAGATGG	143
			BASL-qPCR-R	CCTGGTGGGCTTAGGCTGAG
	TMM	AT1G80080	TMM-qPCR-F	CCGCGATTCCAGACGTTTGC	119
			TMM-qPCR-R	AAACGCCGTGTCGTCTGAGAG
	EPF1	AT2G20875	EPF1-qPCR-F	ACCAACATCCTCCCATCCAAGTC	114
			EPF1-qPCR-R	GAGCAATCTGGCAACCTAGACC
	TR	At2g40435	TR-qPCR-F	AGCTTAAGCAGAAAGTCGAAAGA	100
			TR-qPCR-R	GTTTCCACTGTTACCATTGGTGT
	ERF51	At3g57600	ERF51-qPCR-F	GTACCGTGGAGTCAGGCAAA	102
			ERF51-qPCR-R	TCAGCTGTAGCGAAAGAGCC
	BIM1	At5g08130	BIM1-qPCR-F	TGGAGTAACAACAACCAACAGC	106
			BIM1-qPCR-R	CTTGTGCAGTTGCAAGGACC
	SCL30	At3g46600	SCL30-qPCR-F	AAACGTGACATCGGACCACC	102
			SCL30-qPCR-R	TAGTCTTCGCCCGGTCTCTT
	PSK	At5g53890	PSK-qPCR-F	CGCGATTGATTCTCCTTGCG	105
			PSK-qPCR-R	ACAATGCTGCTTCTCCCGAA
	UBP26	At3g49600	UBP26-qPCR-F	CACCCCTTTACTGTGTTCCCA	112
			UBP26-qPCR-R	TGGTCCGCCATTGAACTTTG
	KAT1	AT5G46240	KAT1-qPCR-F	ACCGCTGGAAGAAGTTACGCTAACG	236	Xie et al., Plant Cell, 2010
			KAT1-qPCR-R	AGCGTTGTCCGCATTGGTGATCTTT
	MYB60	AT1G08810	MYB60-qPCR-F	CATGAAGATGGTGATCATGAGG	111	Negi et al., Current Bio, 2013
			MYB60-qPCR-R	TTCCATTTGACCCCCAGTAG
	GORK	AT5G37500	GORK-qPCR-F	GCATCAGGGAAACATGAGTT	177	Negi et al., Current Bio, 2013
			GORK-qPCR-R	GATACAAGCAGCAGTGTGAG
	WOX5	AT3G11260	WOX5-qPCR-F	GATTGTCAAGAGGAAGAGAAGGTGA	214	Sang et al., Plant Journal, 2012
			WOX5-qPCR-R	AGCTTAATCGAAGATCTAATGGCG
	WOX2	AT5G59340	WOX2-qPCR-F	GCTTACTTCAATCGCCTCCTCCAC	80
			WOX2-qPCR-R	GGACTGACACAACCCACGTTTG
	WOX9	AT2G33880	WOX9-qPCR-F	TCGCATTCTCTCGCTACTGTCC	71
			WOX9-qPCR-R	ACTCTTATTCGTGCGTCCGCTTG
	STM	AT1G62360	STM-qPCR-F	CACCTTCCTCTTTCTCCGGTTATG	77
			STM-qPCR-R	ATCGACTTCTTCCTCGGATGACC
	FUS3	AT3G26790	FUS3-qPCR-F	CGTATGATACTCCCGAAGAAAGCC	142
			FUS3-qPCR-R	TGCTATTGTTGTTTGGCCAGTACC
	LEC1	AT1G21970	LEC1-qPCR-F	AGACGGCAGAGAAACAATGGAACG	89
			LEC1-qPCR-R	TGTGCTGGTCCAAGTTCAATTCAG
ChIP-qPCR	SPCH	At5g53210	SPCHp-F (P1)	TTTGGCGTCTCTTTCTTTCC	91
			SPCHp-R (P1)	TCTTCCTCGTTCGTTGTTTTG
	SPCH	At5g53210	SPCH_U-F	ACTGCGACCACTTATTGGGTTT	85
			SPCH_U-R	TGGAATAATTTAAGCTCTCTTTCTCTC
	SPCH	At5g53210	SPCH_P2-F	CCCTTTGCAATATGCAACCT	138
			SPCH_P2-R	GATGAAATTTGGGGGAGGAT
	SPCH	At5g53210	SPCH_P3-F	CACGATTGAGGCGCTAAAA	98
			SPCH_P3-F	CAATCCCGGTTTCCAAGTAT
	SPCH	At5g53210	SPCH_D1-F	GCAGCAAATGTTCTGAAAATCA	106
			SPCH_D1-R	CTTTCACCCAAAAAGAACATCT
	SPCH	At5g53210	SPCH_D2-F	ACATCATGTTTGGGATGTGAGA	102
			SPCH_D2-R	TTGTGGTTTAAGTTGCATATTCC
	FAMA	At3g24140	FAMA_F	TTTTTATTGGGTCACGAATGTG	109
			FAMAp-R	AGGTATAGCAAGGGGGCATT
	EPF1	AT2G20875	EPF1p-F (P2)	CCCAAGACAATGTCCCTCAT	88
			EPF1p-R (P2)	GACCTTCATTAATGCACCCAAT
	EPF1	AT2G20875	EPF1_U-F	TCCTCTCCTCTTCTGCTTGAGT	110
			EPF1_U-R	AGGCTCAATTTCCCTGAACTTT
	EPF1	AT2G20875	EPF1_P1-F	TGTTCGATCTTGTTTTCATGTG	109
			EPF1_P1-R	AATAGTACGGCGAGAAACAAGG
	EPF1	AT2G20875	EPF1_P3-F	GCCCCCTTTAGCAAATAGAAAC	106
			EPF1_P3-R	ATGCACCTCACCAATCACATTA
	EPF1	AT2G20875	EPF1_D1-F	GCCGTATTTAAGACAGCAACAA	110
			EPF1_D1-R	TTATTAGCGAGCCTCCAAAGTT
	EPF1	AT2G20875	EPF1_D2-F	GCAAACATGTCTGTTTTGGTGT	90
			EPF1_D2-R	AGAGAAAAAGAGATGGCAAACG
	PCNA1	AT1G07370	PCNA1-F	TCTTAAAACGATTGAGGCCG	148	Weimer et al., Plant Cell, 2012
			PCNA1-R	AATCGTTTGCGGCTATTTTG
	CDKB1;2	AT2G38620	CDKB1;2-F	GTGCCAAACATTGAACATTA	165	Nowack et al., Dev Cell, 2012
			CDKB1;2-R	CTTGAAGAGTCGATCATTTC
	IR1 (intergenic region)	Chr3 897163 to 266	IR1-F	CATTGAACACCTATTGGTAGGAA	104	Cruz-Ramírez et al., Cell, 2012
			IR1-R	ACTGTTTTGGTCCAGATTTTCAG
	RB45	Chr4 1786493 to 691	RB45-F	GCGGAACCAATTATAGATGAGG	199	Weimer et al., Plant Cell, 2012
			RB45-R	CGTCAACAGCTCCAAATCAC
